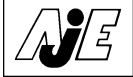

## Human Genome Epidemiology (HuGE) Review

### Meta- and Pooled Analysis of *GSTT1* and Lung Cancer: A HuGE-GSEC Review

S. Raimondi<sup>1</sup>, V. Paracchini<sup>1</sup>, H. Autrup<sup>2</sup>, J. M. Barros-Dios<sup>3</sup>, S. Benhamou<sup>4</sup>, P. Boffetta<sup>5</sup>, M. L. Cote<sup>6</sup>, I. A. Dialyna<sup>7</sup>, V. Dolzan<sup>8</sup>, R. Filiberti<sup>9</sup>, S. Garte<sup>10,11</sup>, A. Hirvonen<sup>12</sup>, K. Husgafvel-Pursiainen<sup>12</sup>, E. N. Imyanitov<sup>13</sup>, I. Kalina<sup>14</sup>, D. Kang<sup>15</sup>, C. Kiyohara<sup>16</sup>, T. Kohno<sup>17</sup>, P. Kremler<sup>18</sup>, Q. Lan<sup>19</sup>, S. London<sup>20</sup>, A. C. Povey<sup>21</sup>, A. Rannug<sup>22</sup>, E. Reszka<sup>23</sup>, A. Risch<sup>24</sup>, M. Romkes<sup>11</sup>, J. Schneider<sup>25</sup>, A. Seow<sup>26</sup>, P. G. Shields<sup>27</sup>, R. C. Sobti<sup>28</sup>, M. Sørensen<sup>29</sup>, M. Spinola<sup>30</sup>, M. R. Spitz<sup>31</sup>, R. C. Strange<sup>32</sup>, I. Stücker<sup>33</sup>, H. Sugimura<sup>34</sup>, J. To-Figueras<sup>35</sup>, S. Tokudome<sup>36</sup>, P. Yang<sup>37</sup>, J-M. Yuan<sup>38</sup>, M. Warholm<sup>22</sup>, and E. Taioli<sup>11</sup>

<sup>1</sup> Policlinico Milano, Milan, Italy.

<sup>2</sup> Institute of Public Health, University of Aarhus, Aarhus, Denmark.

<sup>3</sup> Department of Preventive Medicine and Public Health, University of Santiago de Compostela, Santiago de Compostela, Spain.

<sup>4</sup> INSERM and Evry University, Evry, France.

<sup>5</sup> Genetics and Epidemiology Cluster, International Agency for Research on Cancer, Lyon, France.

<sup>6</sup> Karmanos Cancer Institute, Wayne State University, Detroit, MI.

<sup>7</sup> Department of Virology, University of Crete, Crete, Greece.

<sup>8</sup> Institute of Biochemistry, University of Ljubljana, Ljubljana, Slovenia.

<sup>9</sup> Department of Epidemiology and Biostatistics, National Cancer Research Institute, Genoa, Italy.

<sup>10</sup> Genetics Research Institute, Milan, Italy.

<sup>11</sup> Department of Epidemiology, University of Pittsburgh, Pittsburgh, PA.

<sup>12</sup> Finnish Institute of Occupational Health, Helsinki, Finland.

<sup>13</sup> N. N. Petrov Institute of Oncology, St. Petersburg, Russia.

<sup>14</sup> Department of Medical Biology, School of Medicine, P. J. Šafárik University, Košice, Slovakia.

<sup>15</sup> Institute of Environmental Medicine, Seoul National University, Seoul, Korea.

<sup>16</sup> Department of Preventive Medicine, Kyushu University Graduate School of Medical Sciences, Fukuoka, Japan.

<sup>17</sup> Biology Division, National Cancer Center Research Institute, Tokyo, Japan.

<sup>18</sup> Service of Medical Chemistry, Institute of Pathology, Sart Tilman Liège, Belgium.

<sup>19</sup> Division of Cancer Epidemiology and Genetics, National Cancer Institute, Bethesda, MD.

<sup>20</sup> National Institute for Environmental Health Sciences, Research Triangle Park, NC.

<sup>21</sup> Centre for Occupational and Environmental Health, University of Manchester, Manchester, United Kingdom.

<sup>22</sup> Institute of Environmental Medicine, Karolinska Institutet, Stockholm, Sweden.

<sup>23</sup> Department of Toxicology and Carcinogenesis, Institute of Occupational Medicine, Lodz, Poland.

<sup>24</sup> Department of Toxicology and Cancer Risk Factors, DKFZ-German Cancer Research Center, Heidelberg, Germany.

<sup>25</sup> Institute of Occupational and Social Medicine, University of Giessen, Giessen, Germany.

<sup>26</sup> Department of Community, Occupational and Family Medicine, National University of Singapore, Singapore.

<sup>27</sup> Cancer Genetics and Epidemiology, Georgetown University Medical Center, Washington, DC.

<sup>28</sup> Department of Biotechnology, Panjab University, Chandigarh, India.

<sup>29</sup> Danish Cancer Society, Institute of Cancer Epidemiology, Copenhagen, Denmark.

<sup>30</sup> Department of Experimental Oncology, Istituto Nazionale Tumori, Milan, Italy.

<sup>31</sup> Department of Epidemiology, The University of Texas, M. D. Anderson Cancer Center, Houston, TX.

<sup>32</sup> Centre for Cell and Molecular Medicine, Keele University, North Staffordshire Hospital, Staffordshire, England.

<sup>33</sup> INSERM Unit of Epidemiologic Statistic Research on the Environment and Health, Villejuif Cedex, France.

<sup>34</sup> First Department of Pathology, Hamamatsu University School of Medicine, Hamamatsu, Japan.

<sup>35</sup> Hospital Clinic Provincial Toxicology Unit, Barcelona, Spain.

<sup>36</sup> Department of Health Promotion and Preventive Medicine, Nagoya City University Graduate School of Medical Sciences, Mizuho-ku, Nagoya, Japan.

<sup>37</sup> Department of Health Sciences Research, Mayo Clinic College of Medicine, Rochester, MN.

<sup>38</sup> School of Public Health, University of Minnesota, Minneapolis, MN.

Received for publication July 20, 2005; accepted for publication April 1, 2006.

Correspondence to Dr. Emanuela Taioli, University of Pittsburgh, Department of Epidemiology, 5150 Centre Avenue, Pittsburgh, PA 15232 (e-mail: taiolien@upmc.edu).

Lung cancer is the most common malignancy in the Western world, and the main risk factor is tobacco smoking. Polymorphisms in metabolic genes may modulate the risk associated with environmental factors. The glutathione *S*-transferase theta 1 gene (*GSTT1*) is a particularly attractive candidate for lung cancer susceptibility because of its involvement in the metabolism of polycyclic aromatic hydrocarbons found in tobacco smoke and of other chemicals, pesticides, and industrial solvents. The frequency of the *GSTT1* null genotype is lower among Caucasians (10–20%) than among Asians (50–60%). The authors present a meta- and a pooled analysis of case-control, genotype-based studies that examined the association between *GSTT1* and lung cancer (34 studies, 7,629 cases and 10,087 controls for the meta-analysis; 34 studies, 7,044 cases and 10,000 controls for the pooled analysis). No association was observed between *GSTT1* deletion and lung cancer for Caucasians (odds ratio (OR) = 0.99, 95% confidence interval (CI): 0.87, 1.12); for Asians, a positive association was found (OR = 1.28, 95% CI: 1.10, 1.49). In the pooled analysis, the odds ratios were not significant for either Asians (OR = 0.97, 95% CI: 0.83, 1.13) or Caucasians (OR = 1.09, 95% CI: 0.99, 1.21). No significant interaction was observed between *GSTT1* and smoking on lung cancer, whereas *GSTT1* appeared to modulate occupational-related lung cancer.

disease susceptibility; epidemiology; genes; genetic predisposition to disease; *GSTT1*; lung neoplasms; meta-analysis

Abbreviations: CI, confidence interval; GSEC, Genetic Susceptibility to Environmental Carcinogens; GST, glutathione *S*-transferase; *GSTT1*, glutathione *S*-transferase theta 1 gene; OR, odds ratio.

**Editor's note:** This paper is also available on the website of the Human Genome Epidemiology Network (<http://www.cdc.gov/genomics/hugenet/>).

## GENE

The glutathione *S*-transferase (GST) supergene family consists of phase II detoxifying enzymes catalyzing several reduced glutathione-dependent reactions with compounds containing an electrophilic center (1). The GST family comprises at least eight classes of GST isoenzymes: alpha, mu, pi, sigma, theta, kappa, omega, and zeta (2). Genetic polymorphisms have been described in all these classes (3). The soluble GSTs exist as dimeric proteins of approximately 25 kDa; they are highly expressed, constituting up to 4 percent of the total soluble proteins (4).

Two theta-class GSTs, *GSTT1* and *GSTT2*, have been identified in the human liver, and the corresponding genes are localized in the same region on human chromosome 22, specifically in the subband 22q11.2 (5, 6). *GSTT1* enzymes show important differences in their catalytic activity compared with other GSTs: they have lower glutathione binding activity, with increased catalytic efficiency (7, 8). Theta is considered the most ancient of the GSTs, and theta-like GSTs are found in almost all organisms investigated (2). The encoded *GSTT1* human subunit is about 25,300 Da (9); the gene is 8.1 kb long (10).

Among the GST substrates, there are several environmental carcinogens found in food, air, or medications, such as polycyclic aromatic hydrocarbons, found in combustion products, diet, and tobacco smoke (11). Polycyclic aromatic hydrocarbons are activated by members of the phase I cytochrome P-450 supergene family to epoxide-containing metabolites (e.g., benzo[*a*]pyrene-7,8-diol-9,10-oxide), which are substrates for the mu, alpha, and pi GST classes. *GSTT1*

is an interesting candidate gene for lung cancer susceptibility because of its involvement in the metabolism of chemicals such as methylating agents, pesticides, and industrial solvents (2). In vitro studies suggest that both *GSTT1* and *GSTM1* enzymes protect cells from the toxic products of phase I detoxification reactions (12, 13).

However, *GSTT1*-catalyzed reactions can also increase the toxicity of some compounds, such as dichloromethane (2). GSTs also conjugate isothiocyanates, which are potent inducers of enzymes that detoxify environmental mutagens (14). The conjugation process diverts the isothiocyanates from the enzyme induction pathway into excretion (15), leading to elimination of these anticarcinogenic substances (16) and thus decreasing their potential chemopreventive effect (17).

## GENE VARIANTS

The most common polymorphism in *GSTT1* consists of a deletion of the whole gene, resulting in the lack of active enzyme (18). Complete deletion at the *GSTT1* locus (19) was hypothesized by observing the phenotypic variation in glutathione-related detoxification of halomethanes by human erythrocytes, resulting in “conjugator” and “nonconjugator” phenotypes (20). Recently, another less common polymorphism (*Thr104Pro*) in the *GSTT1* gene was described that also results in a nonconjugator phenotype (21).

The frequency of the *GSTT1* deletion varies among different populations (22). In particular, the prevalence of the *GSTT1* null genotype is lower among Caucasians (10–20 percent) compared with Asians (50–60 percent) (23). The frequency of the *GSTT1* null polymorphism in the controls included in the present meta- and pooled analyses is similar to what was previously published (22): 18.7 percent (meta-analysis) and 19.0 percent (pooled analysis) in Caucasians; 53.8 percent and 53.6 percent, respectively, in Asians; and

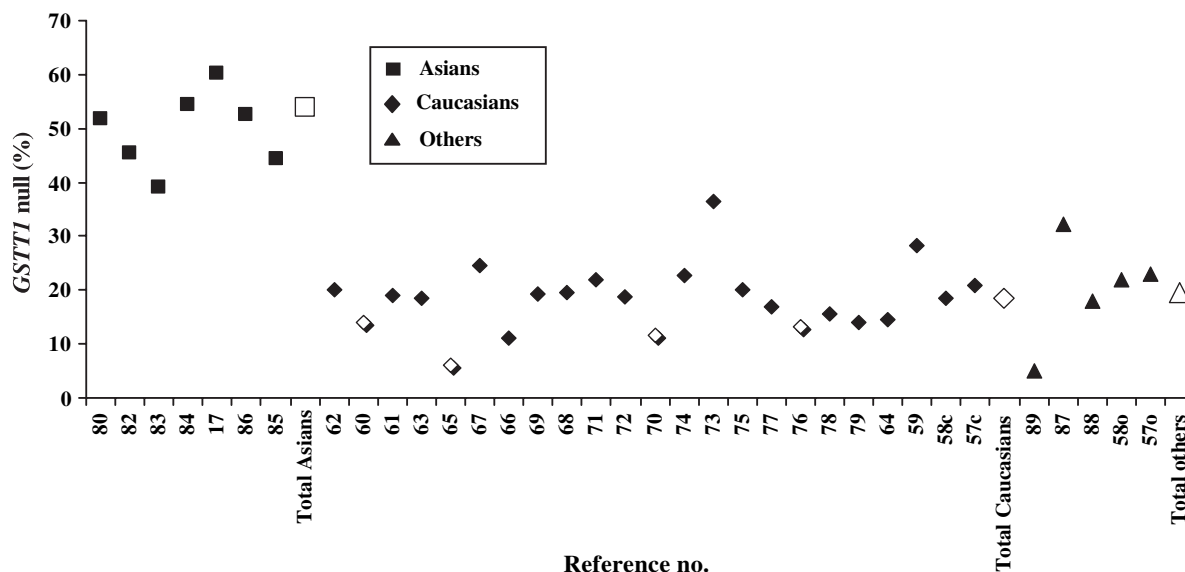

**FIGURE 1.** Frequency of the glutathione *S*-transferase gene (*GSTT1*) deletion in controls from the studies included in the meta-analysis according to ethnicity. The larger white square, diamond, and triangle refer to the average frequency of the *GSTT1* deletion in Asians, Caucasians, and others, respectively. The four smaller white and black diamonds correspond to studies performed in the northern European countries (Sweden, Denmark, and Finland), where the frequency of the deletion is significantly lower. 58c/57c and 58o/57o represent, respectively, the frequencies of *GSTT1* null in Caucasians and in African Americans for the studies by Cote et al. (58) and Wenzlaff et al. (57).

19.4 percent (meta-analysis only) for other ethnic groups (Latinos, African Americans, and mixed). The frequency of the *GSTT1* deletion is graphically presented in figure 1 for each study included in the meta-analysis and is stratified according to ethnicity. Among Caucasians, the frequency of the deletion is significantly lower in northern European countries (Sweden, Denmark, and Finland) than elsewhere in Europe, as previously reported (22, 24). The frequency of the *GSTT1* deletion according to geographic area is 52.2 percent (meta-analysis) and 51.2 percent (pooled analysis) in Asians, 17.3 percent (meta-analysis) and 18.0 percent (pooled analysis) in Europeans, and 21.7 percent (meta-analysis) and 27.0 percent (pooled analysis) in North Americans.

### Gene function

The main function of the GST enzymes is detoxification of electrophiles by conjugation to glutathione. A wide variety of both endogenous electrophilic substrates, such as by-products of reactive oxygen species activity, and exogenous electrophilic substrates, have been identified (2, 25). *GSTT1* also catalyzes the detoxification of oxidized lipids and DNA (2, 8, 26). Halogenated organic compounds, for example, the ethylene dibromide, *p*-nitrobenzyl chloride (27), *p*-nitrophenetyl bromide (28), methyl chloride, and methyl iodide (29, 30), are known substrates for *GSTT1*. The *GSTT1*+ phenotype catalyzes conjugation of dichloromethane to glutathione, a metabolic pathway that has been shown to be more mutagenic than *GSTT1* null in *Salmonella typhimurium* mutagenicity tester strains (31) and was suggested to be responsible for the carcinogenicity of dichloromethane in the mouse (32). The consequence of the null

genotype is reduced or null conjugation activity and, in most cases, an inability to efficiently eliminate electrophilic carcinogens (19, 33).

### DISEASE

Lung cancer is the most common malignancy in the Western world. Although incidence has apparently now peaked in the United States and most of Europe, increasing incidence and mortality is observed in several developing countries. More than a million new cases were diagnosed in 2000, accounting for 12.3 percent of all new cases of cancer, and more than a million subjects died of lung cancer in the same period, accounting for 17.8 percent of all cancer deaths (34). The case fatality (ratio of mortality to incidence), which is an indicator of prognosis, is 0.89, the third worst after that for the pancreas and liver (35).

The main histologic types of lung cancer are squamous cell carcinoma, adenocarcinoma, large cell carcinoma, and small cell carcinoma. The first three are also referred to as non-small cell lung carcinomas. Squamous cell carcinoma, large cell carcinoma, and small cell carcinoma are more strongly associated with smoking than other histologic types. The histologic characteristics of lung cancer have changed in recent decades: the frequency of adenocarcinoma has risen, while that of squamous cell carcinoma has declined (36–39).

### Smoking

The main risk factor for lung cancer is tobacco smoking. Worldwide, the population attributable fraction of lung cancer mortality due to smoking is 79 percent for men and

TABLE 1. Description of the studies included in the meta-analysis

| Authors (reference no.), year   | No. of cases | No. of controls | Country                                                             | Mean age in years (range/SD*) | Male (%)                                       | Histology                                                                               | Source of controls | Matching criteria                               | Crude OR*,† | 95% CI*    |
|---------------------------------|--------------|-----------------|---------------------------------------------------------------------|-------------------------------|------------------------------------------------|-----------------------------------------------------------------------------------------|--------------------|-------------------------------------------------|-------------|------------|
| <i>Caucasian studies</i>        |              |                 |                                                                     |                               |                                                |                                                                                         |                    |                                                 |             |            |
| Reszka et al. (59), 2005‡       | 119          | 138             | Poland                                                              | 58.9 (range, 30–78)§          | 74.69§                                         | SqCC* = 36.6%, SCC* = 25.0%, NSCC* = 18.6%, AC* = 8.9%, others = 8.9§                   | Hospital           | Age and gender                                  | 0.51        | 0.28, 0.94 |
| Alexandrie et al. (60), 2004‡   | 524          | 530             | Sweden                                                              | 54.9 (range, 19–88)           | 71.8                                           | SqCC = 31.6%, SCC = 19.5%, AC = 27.5%, LCC* = 3.1%, others = 8.8%, nonclassified = 9.5% | Healthy            | None                                            | 0.92        | 0.65, 1.31 |
| Belogubova et al. (61), 2004‡   | 167          | 663             | Russia                                                              | 57.6 (range, 18–95; SD, 7.9)  | 54.3                                           | SqCC = 52.7%, SCC = 12.6%, NSCC = 11.4%, AC = 23.3%                                     | Healthy            | None                                            | 0.94        | 0.61, 1.46 |
| Harms et al. (62), 2004         | 110          | 119             | United States                                                       | 58.5 (SD, 10.3)               | 52.4                                           | No information                                                                          | Healthy            | Age, ethnicity, and gender (frequency matching) | 1.55        | 0.84, 2.86 |
| Schneider et al. (63), 2004‡    | 446          | 622             | Germany                                                             | 63.9 (range, 20–96; SD, 10.1) | 94.0                                           | SqCC = 41.1%, SCC = 15.0%, AC = 25.1%, LCC = 3.6%, others = 15.2%                       | Hospital           | None                                            | 0.89        | 0.65, 1.23 |
| Sobti et al. (64), 2004‡        | 100          | 76              | India                                                               | 53.5 (range, 27–80; SD, 9.9)  | 95.5                                           | SqCC = 71.0%, SCC = 24.0%, AC = 4.0%, LCC = 1.0%                                        | Healthy            | Ethnicity                                       | 1.30        | 0.57, 2.94 |
| Sørensen et al. (65), 2004‡     | 254          | 265             | Denmark                                                             | No information                | No information                                 | SqCC = 22.0%, SCC = 20.0%, AC = 33.0%, LCC = 6.0%, others = 19.0%                       | Healthy            | Age, gender, and smoking (frequency matching)   | 2.65        | 1.44, 4.90 |
| Dialyna et al. (66), 2003‡      | 122          | 178             | Greece                                                              | 61.2 (no range or SD)         | 84.3                                           | SqCC = 18.0%, SCC = 17.2%, NSCC = 38.5%, AC = 24.6%, others = 1.7%                      | Healthy            | None                                            | 1.64        | 0.85, 3.18 |
| Ruano-Ravina et al. (67), 2003‡ | 125          | 187             | Spain                                                               | 63.2 (SD, 10.3)               | 90.4                                           | No information                                                                          | Hospital           | None                                            | 0.84        | 0.49, 1.45 |
| Lewis et al. (68), 2002‡        | 87           | 143             | United States                                                       | 62.4 (SD, 12.8)§              | 59.6                                           | SqCC = 33.3%, SCC = 17.2%, NSCC = 10.3%, AC = 11.5%, nonclassified = 27.6%              | Hospital           | None                                            | 1.15        | 0.60, 2.21 |
| Stucker et al. (69), 2002‡      | 251          | 268             | France                                                              | 59.4 (SD, 9.8)                | 100                                            | SqCC = 46.0%, SCC = 19.0%, AC = 24.0%, others = 11.0%                                   | Hospital           | Age, ethnicity, and gender                      | 0.74        | 0.47, 1.17 |
| Hou et al. (70), 2001           | 184          | 162             | Sweden                                                              | 68.1 (range, 30–92)           | <30                                            | SqCC = 22.0%, AC = 51.0%, others = 27.0%                                                | Healthy            | Age, gender, and smoking (frequency matching)   | 1.06        | 0.60, 1.85 |
| Liu et al. (71), 2001           | 1,024        | 1,176           | United States                                                       | 61.4 (SD, 11.5)§              | 49.7§                                          | SqCC = 25.0%, SCC = 8.3%, AC = 51.0%, LCC = 7.6%, others = 6.3%, not classified = 1.4%§ | Healthy            | None                                            | 0.89        | 0.72, 1.09 |
| Risch et al. (72), 2001‡        | 383          | 346             | Germany                                                             | 58.2 (range, 17–92)§          | 68.6§                                          | SqCC = 44.0%, SCC = 2.8%, AC = 39.0%, LCC = 4.9%, others = 10.0%§                       | Hospital           | Ethnicity                                       | 0.63        | 0.42, 0.95 |
| Malats et al. (73), 2000‡       | 122          | 121             | Sweden, Germany, France, Italy, Russia, Rumania, Poland, and Brazil | 61.5 (no range or SD)         | 21.0                                           | SqCC and SCC = 20.7%, AC = 53.7%, others = 25.6%                                        | Hospital           | Ethnicity                                       | 0.62        | 0.36, 1.08 |
| Spitz et al. (74), 2000‡        | 484          | 458             | United States                                                       | 61.6 (SD, 9.7)§               | 53.3§                                          | No information                                                                          | Healthy            | Age, ethnicity, gender, and smoking             | 1.28        | 0.95, 1.72 |
| To-Figueras et al. (75), 1999‡  | 164          | 200             | Spain                                                               | 46.0 (range, 26–87)           | 88.4 (only cases, no information for controls) | SqCC = 31.7%, SCC = 34.8%, AC = 25.6%, LCC = 7.9%                                       | Healthy            | Gender (frequency matching)                     | 1.38        | 0.84, 2.26 |

|                                         |       |        |                |                                                           |                                                 |                                                                                     |          |                                                 |      |             |
|-----------------------------------------|-------|--------|----------------|-----------------------------------------------------------|-------------------------------------------------|-------------------------------------------------------------------------------------|----------|-------------------------------------------------|------|-------------|
| Saarikoski et al. (76), 1998‡           | 204   | 294    | Finland        | 49.7 (SD, 10.2)                                           | 91.6                                            | SqCC = 45.2%, AC = 39.4%, others = 15.4%                                            | Healthy  | None                                            | 0.96 | 0.56, 1.63  |
| Salagovic et al. (77), 1998‡            | 117   | 248    | Slovakia       | No information                                            | 64.1                                            | No information                                                                      | Healthy  | None                                            | 0.78 | 0.42, 1.45  |
| Jourenkova et al. (78), 1997‡           | 150   | 172    | France         | 56.6 (no range or SD)                                     | 94.1                                            | SqCC = 65.3%, SCC = 34.7%                                                           | Hospital | Age and gender (frequency matching)             | 1.18 | 0.66, 2.12  |
| Deakin et al. (79), 1996‡               | 108   | 509    | United Kingdom | 69.7 (no range or SD)                                     | 52.0                                            | No information                                                                      | Hospital | None                                            | 0.82 | 0.47, 1.45  |
| <i>Asian studies</i>                    |       |        |                |                                                           |                                                 |                                                                                     |          |                                                 |      |             |
| Chan-Yeung et al. (80), 2004            | 229   | 197    | China          | 51.7 (SD, 14.9)                                           | 63.6                                            | SqCC = 16.6%, NSCC = 19.2%, AC = 55.5%, others = 8.7%                               | Healthy  | Ethnicity                                       | 1.55 | 1.05, 2.28  |
| Liang et al. (81), 2004                 | 152   | 152    | China          | No information (Chinese language)                         | No information (Chinese language)               | No information (Chinese language)                                                   | Hospital | No information (Chinese language)               | 2.06 | 1.30, 3.24  |
| Wang et al. (82), 2003‡                 | 112   | 119    | Japan          | 55.5 (range, 35–75; SD, 8.2)                              | 65.4                                            | AC = 100%                                                                           | Healthy  | Age and gender                                  | 1.08 | 0.64, 1.81  |
| Sunaga et al. (83), 2002‡               | 198   | 152    | Japan          | 63.9 (SD, 11.3)                                           | 66.3                                            | AC = 100%                                                                           | Hospital | None                                            | 1.58 | 1.03, 2.42  |
| Zhao et al. (84), 2001‡                 | 233   | 187    | Singapore      | 64.7 (SD, 12.4)                                           | 0                                               | No information                                                                      | Hospital | Age (frequency matching)                        | 1.09 | 0.74, 1.60  |
| Kiyohara et al. (85), 2000‡             | 86    | 88     | Japan          | 61.4 (range, 20–86)                                       | 100                                             | SqCC = 27.9%, SCC = 14.0%, AC = 46.5%, LCC = 4.7%, others = 7.0%                    | Healthy  | None                                            | 1.51 | 0.83, 2.75  |
| Lan et al. (86), 2000‡                  | 122   | 122    | China          | 55 (SD, 11.5)                                             | 64.8                                            | No information                                                                      | Healthy  | Age and gender (individual matching)            | 1.35 | 0.81, 2.24  |
| London et al. (17), 2000‡               | 232   | 710    | China          | 58.8 (range, 45–64; SD, 4.8)                              | 100                                             | SqCC = 33.6%, AC = 29.7%, others and nonclassified = 36.6%                          | Healthy  | Age (individual matching)                       | 0.91 | 0.67, 1.23  |
| <i>Other studies</i>                    |       |        |                |                                                           |                                                 |                                                                                     |          |                                                 |      |             |
| Cote et al. (58), 2005‡                 | 304   | 398    | United States  | 41.6 (no range or SD)§                                    | 44.7§                                           | SqCC = 11.7%, SCC = 13.2%, NSCC = 3.7%, AC = 47.7%, LCC = 9.4%, others = 14.3%§     | Healthy  | Age, ethnicity, and gender (frequency matching) | 1.09 | 0.76, 1.58  |
| Wenzlaff et al. (57), 2005‡, ¶          | 153   | 175    | United States  | 58.5 (SD, 13.6)§                                          | 45.8§                                           | SqCC = 15.7%, SCC = 6.6%, AC = 54.2%, LCC = 7.2%, others and nonclassified = 16.3%§ | Healthy  | Age, ethnicity, and gender (frequency matching) | 0.84 | 0.48, 1.44  |
| Yang et al. (87), 2004‡                 | 237   | 234    | United States  | 54.3 (SD, 4.6) (only cases, no information for controls)§ | 51.5 (only cases, no information for controls)§ | SqCC = 13.5%, SCC = 7.6%, NSCC = 13.1%, AC = 52.3%, LCC = 3.8%, others = 8.9%§      | Healthy  | None                                            | 0.88 | 0.78, 0.98  |
| Nazar-Stewart et al. (88), 2003         | 274   | 500    | United States  | No mean age (range, 18–74)                                | 100                                             | SqCC = 29.6%, SCC = 19.0%, NSCC = 16.4%, AC = 35.0%                                 | Healthy  | Age and gender (frequency matching)             | 1.07 | 0.73, 1.56  |
| Gallegos-Arreola et al. (89), 2003–2004 | 52    | 178    | Mexico         | No information                                            | No information                                  | No information                                                                      | Healthy  | None                                            | 5.04 | 1.79, 14.31 |
| Total                                   | 7,629 | 10,087 |                |                                                           |                                                 |                                                                                     |          |                                                 |      |             |

\* SD, standard deviation; OR, odds ratio; CI, confidence interval; SqCC, squamous cell carcinoma; SCC, small cell carcinoma; NSCC, non-small cell carcinoma; AC, adenocarcinoma; LCC, large cell carcinoma.

† Crude ORs were calculated by using the reported frequencies of the *GSTT1* null genotype in cases and controls. For this reason, they could be slightly different from the adjusted ORs reported in each paper.

‡ Studies included in the pooled analysis.

§ The information concerns all subjects included in the original study and not the subset of subjects with data on *GSTT1*.

¶ Part of the subjects included in this study were also included in the study by Cote et al. (58) (35 cases and 79 controls, personal communication by the authors).

48 percent for women (40). In Western countries, the population attributable fraction due to smoking was estimated to be approximately 90 percent for men and approximately 70 percent for women. Lung cancer risk significantly decreases with smoking cessation; however, the relative risk remains 1.5–2.0 times the risk for never smokers (41). Lung cancer is also associated with environmental tobacco smoke (42). Other risk factors are diet (43), outdoor air pollution, occupational exposures to carcinogens (44), and radon (45).

## ASSOCIATIONS AND INTERACTIONS

The association between *GSTT1* and lung cancer was assessed through a meta-analysis of all published papers and a pooled analysis of selected published and unpublished studies. A Medline search was performed from January 1995 (the date when the first case-control studies on *GSTT1* and lung cancer were published) to March 2005 using different combinations of the keywords “glutathione *S*-transferase,” “*GSTT1*,” and “lung” without restriction on language. The computer search was supplemented by consulting the bibliographies from the articles found through the Medline search and by looking at two review papers (2, 46). An initial screening of all the abstracts provided 50 articles containing information on both *GSTT1* and lung cancer. Eligible were case-control, genotype-based studies that reported the frequency of *GSTT1* or the odds ratio for *GSTT1* and lung cancer. Both hospital- and population-based case-control studies were included in the analysis. Of the 50 articles selected, excluded were two because they were a pooled analysis of existing data (47, 48), three because they reported on studies that included either only cases of lung cancer ( $n = 1$ ) or only controls ( $n = 2$ ), and three because they did not report the frequency of *GSTT1* or the odds ratio of lung cancer for *GSTT1* deletion. We also excluded eight studies (49–56) because the subjects were the same as those in other studies. In case of multiple publications on the same population, the most recent publications, with the largest group of subjects with data on *GSTT1*, were always included in this analysis. Two studies (57, 58) were included in the meta-analysis although they contained a small number (35 cases and 79 controls) of overlapping subjects. Therefore, the final number of articles considered for the present analysis was 34 (17, 57–89), including a total of 7,629 cases and 10,087 controls; table 1 describes the studies.

The pooled analysis was performed by using the Genetic Susceptibility to Environmental Carcinogens (GSEC) database ([www.gsec.net](http://www.gsec.net)). The design of this study is explained in detail elsewhere (90). Briefly, this collaborative project gathers information from both published and unpublished case-control studies on metabolic gene polymorphisms and cancer. The investigators who agreed to participate sent their original data sets, with individual genetic and epidemiologic data for each subject. Quality and logical controls on the data are usually performed by the research assistant when entering the data in the main GSEC database. In addition, a questionnaire was provided to each participant at the time of enrollment in the study; it contained information on the study design, the selection and source of controls, the lab-

oratory methods used for genotyping subjects, the source of DNA for genotype analysis, and the response rates for both cases and controls. Some of this information has been published previously (91).

We selected, from the GSEC database, all studies that had information on *GSTT1* and lung cancer. We also contacted all investigators of studies for which data were not available through the GSEC project and asked them to provide their data for this specific pooled analysis. We were able to obtain data from 27 of the 34 studies included in the meta-analysis (79 percent; refer to table 1 for details). The number of subjects included in some data sets is slightly different from the published data because they may also include some unpublished data. The GSEC database contained seven additional studies with completely unpublished data on *GSTT1* and lung cancer; therefore, the pooled analysis included 34 studies, for a total of 7,044 cases and 10,000 controls.

## Statistical analysis

For the meta-analysis, study-specific crude odds ratios and 95 percent confidence intervals for lung cancer for *GSTT1* deletion were estimated on the basis of the reported frequencies of *GSTT1* deletion in cases and controls. The Egger test (92) was performed on the overall data sets and after stratification for ethnicity (Caucasians, Asians, other ethnic groups) and source of the control group (healthy or hospitalized controls). Funnel plots were used for a graphic representation of publication bias.

Other ethnic groups were represented by fewer than three studies each and therefore were grouped together as “others” in the analyses on ethnicity. Such ethnic groups included Latinos (one study), African Americans (two studies), and mixed populations (two studies). The hypothesis of homogeneity among studies was tested by the  $Q$  statistic, with  $p$  values of  $<0.05$  indicating the presence of heterogeneity among studies. The  $Q$  statistic was performed on all of the studies and according to ethnicity and type of controls. When the test for heterogeneity was not statistically significant, a fixed-effects model was performed; a random-effects model was used when heterogeneity across studies was statistically observed (93).

Because the frequency of *GSTT1* null differs according to ethnicity, summary odds ratios were calculated for all studies combined as well as for subgroups of studies performed with different ethnic groups (Caucasians, Asians, others). Further stratification was performed within each of the three ethnic groups according to type of controls (hospital or healthy controls). Use of hospital-based controls can bias the risk estimates if the diseases of the controls are related to the genetic variant under study.

Pooled analysis was performed separately for the two major ethnic groups (Caucasians and Asians) to avoid the confounding effect of ethnicity already observed in the meta-analysis. Study-specific crude odds ratios and 95 percent confidence intervals for lung cancer and *GSTT1* deletion were estimated, and their homogeneity was tested by using both  $Q$  and Breslow-Day’s tests. Crude and adjusted odds ratios were calculated for each ethnic group and for the total set of the available studies. Separate analyses were

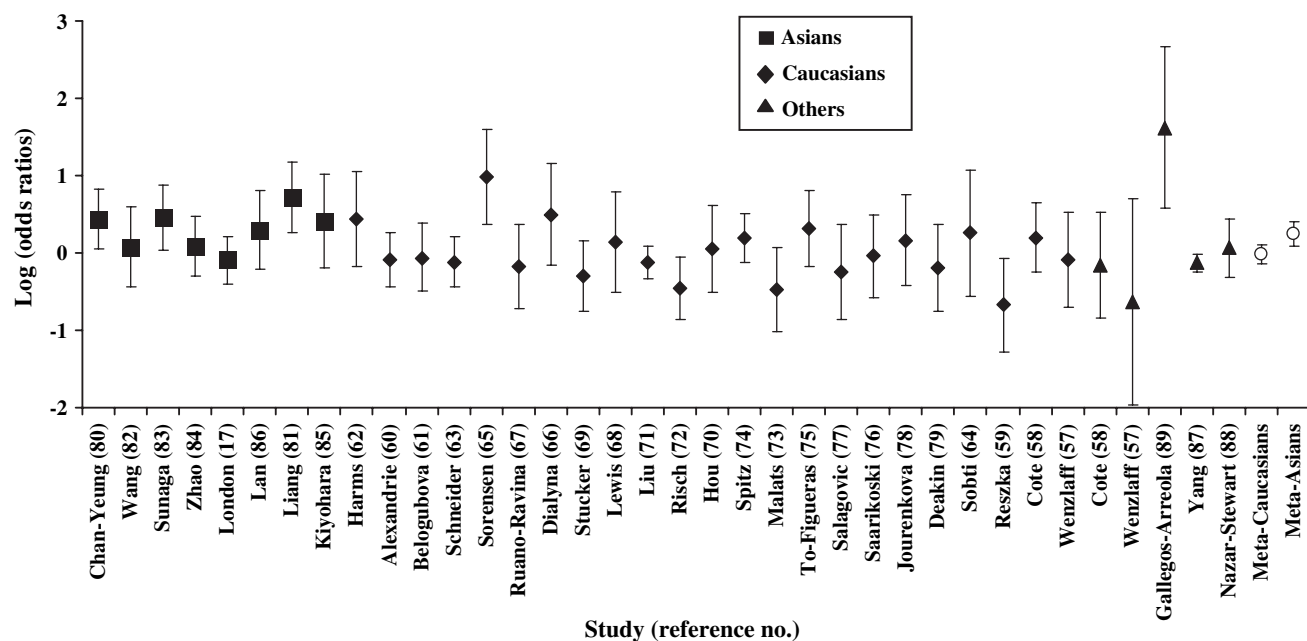

**FIGURE 2.** Study-specific and meta-log(odds ratios) with 95% confidence intervals for glutathione S-transferase gene (*GSTT1*) null and lung cancer according to ethnicity.

conducted on the studies included in both the meta- and pooled analyses and on the studies present in the pooled analysis only, which had not been previously published. When heterogeneity between studies was observed, a sensitivity analysis was performed by restricting the analysis to the studies for which evidence for heterogeneity of effects was not found. Stratified analyses were conducted according to the type of control population, smoking habits, and histologic type (adenocarcinoma, squamous cell carcinoma, and small cell carcinoma). For smoking habits, subjects were divided into four classes by using the information on packs of cigarettes smoked times years of smoking. The baseline class included never smokers; the other three classes were created according to tertiles of the variable pack-years. A further analysis on histologic type was performed to assess whether the *GSTT1* null polymorphism was more frequent in adenocarcinoma than in squamous cell carcinoma cases (the two histologic types present most often in the data set). For this purpose, crude and adjusted odds ratios and 95 percent confidence intervals were calculated.

For studies including Caucasian subjects, the large sample size enabled us to stratify the data according to occupational exposure. Adjusted odds ratios were calculated by using multiple logistic regression models including study number, age (continuous variable), sex, and smoking status (ever/never) as covariates. In the same ethnic group, interactions between *GSTT1* deletion and smoking habits and occupational exposure were formally assessed by adding a product term, respectively, to a model containing the main effect of *GSTT1*, the categories of smoking habits, and the other possible confounding variables (study, age, and sex), and to a model containing the main effect of *GSTT1*, the cat-

egories of occupational exposure (exposed/nonexposed), and the other possible confounding variables (study, age, sex, and smoking habits). Models with or without an interaction term were compared by using the likelihood ratio test. The three studies (65, 74, Dragani (unpublished data)) for which the controls were frequency matched to the cases on smoking were excluded from the analysis of an interaction between *GSTT1* and smoking.

The meta-analysis was performed by using the STATA software package (Stata Corporation, College Station, Texas). The pooled analysis was conducted by using SAS, version 8e software (SAS Institute, Inc., Cary, North Carolina).

## RESULTS

### Meta-analysis

The study-specific odds ratios and the meta-odds ratios for studies including Asian and Caucasian subjects are presented in figure 2. Two studies (57, 58) reported separate analyses for two different ethnic groups (Caucasians and African Americans); therefore, they were included in the analysis of both Caucasians (by calculating the odds ratio for Caucasians only) and the other ethnic groups (by calculating the odds ratio for African Americans only). In the 23 studies on Caucasians, 20 odds ratios were spread around the null effect (nine above the unit and 11 under the unit); only one study (65) reported a significant positive association between lung cancer and *GSTT1* null (odds ratio (OR) = 2.65, 95 percent confidence interval (CI): 1.44, 4.90), whereas two studies (59, 72) reported a significant negative association (OR = 0.63, 95 percent CI: 0.42, 0.95 and

TABLE 2. Odds ratios and 95% confidence intervals for the association between *GSTT1*\* and lung cancer: meta analysis

|                              | No. of studies† | No. of cases | No. of controls | <i>GSTT1</i> null cases |       | <i>GSTT1</i> null controls |       | OR*  | 95% CI*    | Q-test p value |
|------------------------------|-----------------|--------------|-----------------|-------------------------|-------|----------------------------|-------|------|------------|----------------|
|                              |                 |              |                 | No.                     | %     | No.                        | %     |      |            |                |
| All                          | 34              | 7,629        | 10,087          | 1,823‡                  | 24.4‡ | 2,417‡                     | 24.3‡ | 1.07 | 0.96, 1.19 | <0.001         |
| Caucasians                   |                 |              |                 |                         |       |                            |       |      |            |                |
| All                          | 23              | 5,585        | 7,300           | 1,017                   | 18.3  | 1363                       | 18.7  | 0.99 | 0.87, 1.12 | 0.02           |
| Healthy controls             | 14              | 3,794        | 4,794           | 713                     | 18.8  | 853                        | 17.8  | 1.08 | 0.96, 1.21 | 0.10           |
| Hospitalized controls        | 9               | 1,791        | 2,506           | 304                     | 17.0  | 510                        | 20.4  | 0.79 | 0.67, 0.93 | 0.46           |
| Asians                       |                 |              |                 |                         |       |                            |       |      |            |                |
| All                          | 8               | 1,364        | 1,727           | 669‡                    | 55.3‡ | 847‡                       | 53.8‡ | 1.28 | 1.10, 1.49 | 0.09           |
| Healthy controls             | 5               | 781          | 1,236           | 438                     | 56.1  | 686                        | 55.5  | 1.18 | 0.97, 1.42 | 0.22           |
| Hospitalized controls        | 3               | 583          | 491             | 231‡                    | 54.0‡ | 161‡                       | 47.5‡ | 1.47 | 1.15, 1.87 | 0.10           |
| Others: all healthy controls | 5               | 680          | 1,060           | 137                     | 20.1  | 207                        | 19.5  | 1.08 | 0.72, 1.59 | 0.02           |

\* *GSTT1*, glutathione S-transferase gene; OR, odds ratio; CI, confidence interval.

† Two studies (Cote et al. (58), Wenzlaff et al. (57)) reported separate information on Caucasians and African Americans. We used the OR calculated for both groups together to determine the overall meta-OR and the race-specific ORs for the stratified analysis. For this reason, the data by Cote et al. and Wenzlaff et al. were partially included in the meta-analysis on both Caucasians and other ethnic groups.

‡ No information on the frequency of *GSTT1* null from one study (Liang et al. (81), 152 cases and 152 controls).

OR = 0.51, 95 percent CI: 0.28, 0.94, respectively). For Asians, all but one study found odds ratios above 1.00, with three studies (80, 83, 86) reaching statistical significance. The odds ratios in studies including Asian subjects ranged from 0.91 (95 percent CI: 0.67, 1.23) to 2.06 (95 percent CI: 1.30, 3.24). Among the other five studies on different ethnic groups, one (89) reported a very high risk (OR = 5.04, 95 percent CI: 1.79, 14.31) of lung cancer for Latino subjects carrying *GSTT1* null; the other four studies, conducted in mixed populations (87, 88) and among African-American subjects (57, 58), reported no association between *GSTT1* deletion and lung cancer.

The meta-odds ratios in table 2 refer to the analyses conducted on all studies and on stratified data. The meta-odds ratio for all studies combined was 1.07 (95 percent CI: 0.96, 1.19), with a large heterogeneity ( $Q$ -test  $p < 0.001$ ) and evidence of publication bias (Egger's test  $p = 0.02$ ). The sensitivity analysis indicated that by excluding five studies (65, 80, 81, 83, 89), the evidence of publication bias was reduced under the significance level (Egger's test  $p = 0.14$ ), and heterogeneity was no longer present among the studies ( $Q$ -test  $p = 0.23$ ). The meta-odds ratio calculated after exclusion of these five studies was lower (OR = 0.94, 95 percent CI: 0.88, 1.01). Of the five excluded studies, three included Asians, one Latinos, and one Caucasians; therefore, we attributed a large part of the observed heterogeneity to ethnicity.

In the analysis stratified by ethnicity, no association was observed between *GSTT1* deletion and lung cancer among Caucasian subjects (OR = 0.99, 95 percent CI: 0.87, 1.12), with heterogeneity between the studies still present ( $Q$ -test  $p = 0.02$ ) but no evidence of publication bias (Egger's test  $p = 0.42$ ). Heterogeneity was not present after exclusion of the only study that presented a case-cohort design (65).

Among Asians, a significant positive association was found between lung cancer and the *GSTT1* null genotype (meta-OR = 1.28, 95 percent CI: 1.10, 1.49). The test for hetero-

geneity was not statistically significant for the eight studies including Asian subjects ( $Q$ -test  $p = 0.09$ ), and no evidence of publication bias was observed (Egger's test  $p = 0.16$ ).

For all the other studies on different ethnic groups, the meta-odds ratio was 1.08 (95 percent CI: 0.72, 1.59), with heterogeneity ( $Q$ -test  $p = 0.02$ ) but no evidence of publication bias (Egger's test  $p = 0.28$ ). The heterogeneity was probably due to the different ethnicities included in these studies. Table 2 presents the meta-odds ratios stratified according to type of controls and according to ethnicity. For Caucasians, the association with *GSTT1* null was stronger in the analysis conducted of studies including healthy subjects (OR = 1.08, 95 percent CI: 0.96, 1.21) than that for studies including hospital controls (OR = 0.79, 95 percent CI: 0.67, 0.93). Among the studies including Asian subjects, a significant association between *GSTT1* deletion and lung cancer was observed only when the analysis was restricted to studies including hospital controls (OR = 1.47, 95 percent CI: 1.15, 1.87), whereas such an association was less evident for studies including healthy controls (OR = 1.18, 95 percent CI: 0.97, 1.42). No heterogeneity or publication bias was found in these stratified analyses (results not shown).

### Pooled analysis

Crude study-specific odds ratios and 95 percent confidence intervals are reported in table 3 for Asians and table 4 for Caucasians. No heterogeneity between studies including Asian subjects was observed; for Caucasians, the test for heterogeneity was statistically significant. However, exclusion of one case-cohort study (65) made the sample statistically homogenous ( $p$  for  $Q$  and Breslow-Day's tests = 0.09).

The summary odds ratios of lung cancer for *GSTT1* null and lung cancer are presented in table 5 for Asians and table 6 for Caucasians. The adjusted summary odds ratios for all studies combined were not significant for Asians



**TABLE 3. Description of Asian studies included in the pooled analysis: study-specific crude odds ratios and 95% confidence intervals**

| Author(s) (reference no.), year                           | No. of cases | No. of controls | Source of controls | Crude OR*,† | 95% CI*     |
|-----------------------------------------------------------|--------------|-----------------|--------------------|-------------|-------------|
| Sugimura (unpublished data)                               | 215          | 166             | Hospital           | 0.97        | 0.64, 1.48  |
| Kang (unpublished data)                                   | 169          | 196             | Hospital           | 0.75        | 0.49, 1.13  |
| Kiyohara et al. (85), 2000‡                               | 86           | 90              | Healthy            | 1.44        | 0.80, 2.61  |
| Lan et al. (86), 2000‡                                    | 122          | 122             | Healthy            | 1.35        | 0.81, 2.24  |
| Wang et al. (82), 2003‡                                   | 112          | 119             | Healthy            | 1.08        | 0.64, 1.81  |
| Yang et al. (87), 2004                                    | 2            | 7               | Healthy            | 1.33        | 0.06, 31.12 |
| Zhao et al. (84), 2001‡                                   | 233          | 187             | Hospital           | 1.09        | 0.74, 1.60  |
| Cote et al. (58), 2005 and<br>Wenzlaff et al. (57), 2005§ | 2            | 3               | Healthy            | 2.00        | 0.05, 78.25 |
| Sunaga et al. (83), 2002‡                                 | 198          | 152             | Hospital           | 1.58        | 1.03, 2.42  |
| London et al. (17), 2000‡                                 | 234          | 714             | Healthy            | 0.89        | 0.66, 1.20  |

\* OR, odds ratio; CI, confidence interval.

† *p* value for Breslow-Day's test for homogeneity = 0.3; *p* value for *Q* test for homogeneity = 0.39.

‡ Studies included in the meta-analysis on Asian subjects.

§ The original data set from the two studies did not include overlapping subjects.

(OR = 0.97, 95 percent CI: 0.83, 1.13) or for Caucasians (OR = 1.09, 95 percent CI: 0.99, 1.21). Among Caucasians, when the analysis was restricted to the studies for which the test for heterogeneity was not statistically significant, lower odds ratios were observed. If the analysis was restricted to studies included in both the meta- and pooled analyses, the odds ratios became similar to the summary odds ratios obtained from the meta-analysis. The analysis restricted to studies included in the pooled analysis only, which include unpublished data on *GSTT1* and lung cancer, showed lower odds ratios for both Asian and Caucasian subjects. For both Asians and Caucasians, higher adjusted summary odds ratios were found when the analysis included healthy controls in comparison with hospitalized controls.

A stratified analysis according to smoking status was performed by using the information on packs of cigarettes smoked times years of smoking, available for 2,642 of the 3,129 Asians (84 percent) and for 9,950 of the 13,511 Caucasians (74 percent). The observed association between *GSTT1* and lung cancer was present, although nonsignificant, among never smokers, but it decreased with increasing amount of smoking for both Asians and Caucasians (figure 3).

Small cell carcinoma was associated with *GSTT1* deletion in Asian subjects (crude OR = 1.96, 95 percent CI: 1.15, 3.23), but the odds ratio was not statistically significant after adjusting for study, age, gender, and smoking (adjusted OR = 1.45, 95 percent CI: 0.76, 2.77). No association was found between *GSTT1* and the other histologic types in the two ethnic groups (table 7). The adjusted odds ratio for adenocarcinoma in comparison with squamous cell carcinoma with *GSTT1* deletion was 0.94 (95 percent CI: 0.65, 1.36) for Asian subjects and 1.03 (95 percent CI: 0.83, 1.29) for Caucasian subjects.

The large sample of Caucasians enabled us to perform a stratified analysis according to the presence of occupational exposure. The information was available for 4,719 of 13,511 subjects (35 percent), and the results are reported

in table 8. A significant protective effect of *GSTT1* deletion on lung cancer was observed for subjects occupationally exposed. Because the agents reported in the data set were extremely heterogeneous (chemicals, polycyclic aromatic hydrocarbons, asbestos, metals, radiation, etc.), we restricted the analysis to asbestos exposure and found the same protective effect (table 8).

There was no statistical evidence of multiplicative interaction between *GSTT1* and smoking for Caucasians (*p* for the likelihood ratio test = 0.90). A significant antagonist effect of occupational exposure and *GSTT1* deletion was observed, with an odds ratio for interaction of 0.69 (95 percent CI: 0.51, 0.94, *p* for the likelihood ratio test = 0.02; table 9). However, when we restricted the analysis to asbestos exposure, the interaction with *GSTT1* was nonsignificant (*p* for the likelihood ratio test = 0.08; table 9), although subjects carrying the *GSTT1* deletion and exposed to asbestos had a lower risk of developing cancer in comparison with not occupationally exposed subjects in whom *GSTT1* was present (OR = 0.59, 95 percent CI: 0.41, 0.86).

## DISCUSSION

The meta-analysis highlighted a higher risk of developing lung cancer for Asian subjects carrying the *GSTT1* null genotype (OR = 1.28, 95 percent CI: 1.10, 1.49), but the pooled analysis did not confirm this result (adjusted OR = 0.97, 95 percent CI: 0.83, 1.13). The lower odds ratio observed in the pooled analysis was mainly due to two unpublished studies (Sugimura, Kang), which reported a nonsignificant negative association between *GSTT1* and lung cancer. No significant association between lung cancer and *GSTT1* deletion was present in Caucasian subjects in either the meta-analysis or the pooled analysis. Our results were consistent with a previously published pooled analysis on a subset of subjects included in this study that showed no

**TABLE 4. Description of Caucasian studies included in the pooled analysis: study-specific crude odds ratios and 95% confidence intervals**

| Author(s) (reference no.), year                        | No. of cases | No. of controls | Source of controls   | Crude OR*,† | 95% CI*    |
|--------------------------------------------------------|--------------|-----------------|----------------------|-------------|------------|
| Saarikoski et al. (76), 1998‡                          | 237          | 347             | Healthy              | 1.15        | 0.71, 1.87 |
| Dolzan (unpublished data)                              | 201          | 102             | Healthy              | 0.73        | 0.41, 1.28 |
| Kremers (unpublished data)                             | 48           | 71              | Healthy              | 0.64        | 0.31, 1.33 |
| Alexandrie et al. (60), 2004‡ and unpublished data     | 596          | 1,627           | Healthy              | 0.88        | 0.67, 1.16 |
| Risch et al. (72), 2001‡                               | 399          | 358             | Hospital             | 0.73        | 0.49, 1.09 |
| Romkes (unpublished data)                              | 30           | 43              | Healthy              | 0.38        | 0.13, 1.13 |
| Deakin et al. (79), 1996‡                              | 163          | 603             | Hospital             | 0.89        | 0.56, 1.40 |
| Stucker et al. (69), 2002‡                             | 251          | 268             | Hospital             | 0.74        | 0.47, 1.17 |
| Spitz et al. (74), 2000‡                               | 484          | 458             | Healthy              | 1.28        | 0.95, 1.72 |
| To-Figueras et al. (75), 1999‡                         | 164          | 324             | Healthy and hospital | 1.23        | 0.79, 1.92 |
| Malats et al. (73), 2000‡                              | 242          | 157             | Hospital             | 1.05        | 0.68, 1.60 |
| Jourenkova et al. (78), 1997‡                          | 150          | 172             | Hospital             | 1.18        | 0.66, 2.12 |
| Salagovic et al. (77), 1998‡                           | 354          | 394             | Healthy              | 1.06        | 0.74, 1.54 |
| Lewis et al. (68), 2002‡                               | 87           | 143             | Hospital             | 1.15        | 0.60, 2.21 |
| Ruano-Ravina et al. (67), 2003‡                        | 125          | 187             | Hospital             | 0.84        | 0.49, 1.45 |
| Dragani T/Neri (unpublished data)                      | 104          | 97              | Healthy              | 1.70        | 0.92, 3.16 |
| Dialyna et al. (66), 2003‡                             | 122          | 178             | Healthy              | 1.64        | 0.85, 3.18 |
| Reszka et al. (59), 2005‡                              | 119          | 138             | Hospital             | 0.51        | 0.28, 0.94 |
| Schneider et al. (63), 2004‡                           | 499          | 644             | Healthy and hospital | 0.87        | 0.64, 1.19 |
| Yang et al. (87), 2004                                 | 216          | 219             | Healthy              | 0.63        | 0.41, 0.98 |
| Belogubova et al. (61), 2004‡                          | 167          | 663             | Healthy              | 0.94        | 0.61, 1.46 |
| Sobti et al. (64), 2004‡                               | 110          | 110             | Healthy              | 1.07        | 0.52, 2.21 |
| Cote et al. (58), 2005 and Wenzlaff et al. (57), 2005§ | 342          | 461             | Healthy              | 1.30        | 0.93, 1.81 |
| Shields (unpublished data)                             | 30           | 30              | Hospital             | 1.00        | 0.32, 3.14 |
| Sørensen et al. (65), 2004‡                            | 254          | 250             | Healthy              | 2.67        | 1.43, 5.00 |

\* OR, odds ratio; CI, confidence interval.

† *p* value for Breslow-Day's test for homogeneity = 0.01; excluding the Sørensen et al. study = 0.09. *p* value for *Q* test for homogeneity = 0.01; excluding the Sørensen et al. study = 0.09.

‡ Studies included in the meta-analysis on Caucasian subjects.

§ The original data set from the two studies did not include overlapping subjects.

statistically significant effect of *GSTT1* null on lung cancer for Caucasians at younger ages (47). The deletion in the *GSTT1* gene was not associated with lung cancer in two previous reviews (2, 46), even though both authors underlined that *GSTT1* deletion could play a role in lung carcinogenesis when *GSTM1* is concurrently lacking.

Because both smoking and occupational exposure are independent risk factors for lung cancer, we studied their interaction with *GSTT1* by using the pooled data set of individual data. We found no significant interaction between *GSTT1* and lifetime tobacco consumption on lung cancer; however, a negative trend of the odds ratios with increasing amount of lifetime smoking was observed for both Caucasians and Asians. This finding could be explained by the relevant role of genetic factors at low-dose-carcinogen exposures (94–97). The lack of interaction between *GSTT1*

and smoking is consistent with the hypothesis that polycyclic aromatic hydrocarbons, carcinogenic compounds found in tobacco smoke, are minor substrates for *GSTT1* (2).

A significant negative interaction was observed between being occupationally exposed and *GSTT1*: exposed subjects for whom *GSTT1* was present were at higher risk of lung cancer than exposed subjects carrying the *GSTT1* null genotype. It has to be kept in mind that the information on occupational exposure available through the GSEC database is very limited. For example, the data set contains information on only broad categories of agents to which subjects were occupationally exposed; no information on amount or length of exposure is available. Therefore, a more in-depth analysis of this interesting result was not possible. A possible hypothesis is that some compounds present in occupational settings—such as dichloromethane

**TABLE 5. Odds ratios and 95% confidence intervals for the association between *GSTT1*\* and lung cancer: pooled analysis on Asian subjects**

|                                                             | No. of studies | No. of cases | No. of controls | No. of <i>GSTT1</i> null cases | No. of <i>GSTT1</i> null controls | OR*   | 95% CI*    | OR†   | 95% CI     |
|-------------------------------------------------------------|----------------|--------------|-----------------|--------------------------------|-----------------------------------|-------|------------|-------|------------|
| All studies                                                 | 10             | 1,373        | 1,756           | 695                            | 919                               | 0.93  | 0.81, 1.08 | 0.97  | 0.83, 1.13 |
| Studies included in the meta-analysis on Asian subjects     | 6              | 985          | 1,384           | 538                            | 749                               | 1.02  | 0.87, 1.20 | 1.03  | 0.86, 1.24 |
| Studies not included in the meta-analysis on Asian subjects | 4              | 388          | 372             | 157                            | 170                               | 0.81  | 0.61, 1.08 | 0.78  | 0.58, 1.06 |
| Studies based on healthy controls                           | 6              | 558          | 1,055           | 309                            | 592                               | 0.97  | 0.79, 1.19 | 1.01  | 0.80, 1.27 |
| Studied based on hospitalized controls                      | 4              | 815          | 701             | 386                            | 327                               | 1.03‡ | 0.84, 1.26 | 0.97‡ | 0.78, 1.20 |

\* *GSTT1*, glutathione *S*-transferase gene; OR, odds ratio; CI, confidence interval.  
 † OR adjusted for study, sex, smoking (ever/never), and age (continuous variable).  
 ‡ ORs calculated by excluding controls with other pulmonary diseases—crude: 0.94, 95% CI: 0.76, 1.17; adjusted: 0.78, 95% CI: 0.61, 0.99.

and other halogenated compounds, known substrates of *GSTT1*—are transformed by *GSTT1* into mutagenic intermediates; thus, *GSTT1*-positive subjects might be more prone than *GSTT1*-null subjects to the genotoxic action of halogenated compounds via the *GSTT1* pathway (2). Some translational studies on intermediate biomarkers of exposure and effect suggest that subjects carrying the *GSTT1* deletion may have lower levels of the biomarkers

than subjects with the functional *GSTT1*, pointing at a different role of *GSTT1* on cancer causation (98–104).

To our knowledge, this is the first comprehensive meta- and pooled analysis assessing the role of *GSTT1* deletion on lung cancer, and the only one on Asians. The large number of cancer cases included in this analysis (*N* = 6,633) provided 100 percent statistical power to find an odds ratio of 1.5 for both Asians and Caucasians. Because

**TABLE 6. Odds ratios and 95% confidence intervals for the association between *GSTT1*\* and lung cancer: pooled analysis on Caucasian subjects**

|                                                                 | No. of studies | No. of cases | No. of controls | No. of <i>GSTT1</i> null cases | No. of <i>GSTT1</i> null controls | OR*    | 95% CI*    | OR†    | 95% CI     |
|-----------------------------------------------------------------|----------------|--------------|-----------------|--------------------------------|-----------------------------------|--------|------------|--------|------------|
| All studies                                                     | 25             | 5,494        | 8,044           | 1,086                          | 1,525                             | 1.05‡  | 0.97, 1.15 | 1.09‡  | 0.99, 1.21 |
| Studies included in the meta-analysis on Caucasian subjects     | 18             | 4,523        | 7,021           | 837                            | 1,244                             | 1.05§  | 0.96, 1.16 | 1.04§  | 0.93, 1.17 |
| Studies not included in the meta-analysis on Caucasian subjects | 7              | 971          | 1,023           | 249                            | 281                               | 0.91   | 0.75, 1.11 | 0.96   | 0.76, 1.22 |
| Studies based on healthy controls                               | 16¶            | 3,928        | 5,518           | 784                            | 1,012                             | 1.11#  | 1.00, 1.23 | 1.15#  | 1.01, 1.30 |
| Studied based on hospitalized controls                          | 11¶            | 2,229        | 2,526           | 427                            | 513                               | 0.93** | 0.81, 1.07 | 0.99** | 0.85, 1.16 |

\* *GSTT1*, glutathione *S*-transferase gene; OR, odds ratio; CI, confidence interval.  
 † OR adjusted for study, sex, smoking (ever/never), and age (continuous variable).  
 ‡ ORs calculated by excluding the Sørensen et al. study (65)—crude: 1.04, 95% CI: 0.95, 1.14; adjusted: 1.06, 95% CI: 0.96, 1.17.  
 § ORs calculated by excluding the Sørensen et al. study—crude: 1.04, 95% CI: 0.94, 1.15; adjusted: 1.01, 95% CI: 0.90, 1.14.  
 ¶ Two studies (To-Figueras et al. (75), Schneider et al. (63)) contained both healthy and hospital controls. Because it was possible to separate healthy controls from hospital controls, each type of control was included in the correspondent analysis.  
 # ORs calculated by excluding the Sørensen et al. study—crude: 1.09, 95% CI: 0.98, 1.22; adjusted: 1.07, 95% CI: 0.94, 1.22.  
 \*\* ORs calculated by excluding controls with other types of cancer or pulmonary diseases—crude: 0.84, 95% CI: 0.72, 0.99; adjusted: 0.88, 95% CI: 0.73, 1.05.

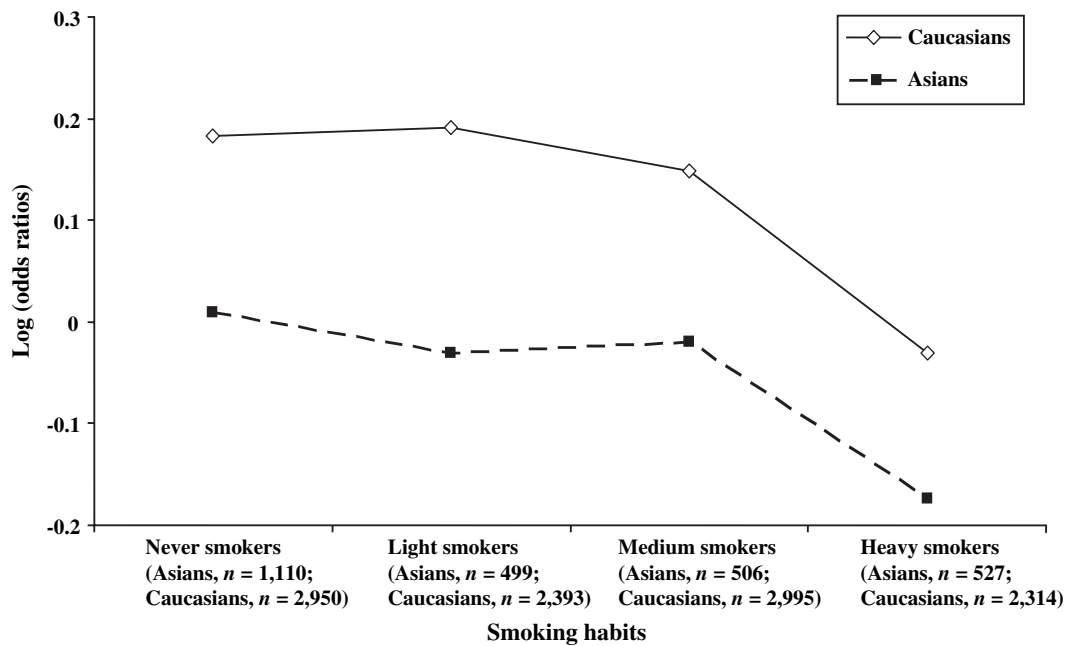

**FIGURE 3.** Adjusted odds ratios (ORs) for the glutathione *S*-transferase gene (*GSTT1*) deletion and lung cancer according to smoking habits (tertiles of pack-years): pooled analysis for Asians and Caucasians. ORs were adjusted for study, sex, and age (continuous variable). Asian never smokers: OR = 1.01, 95% confidence interval (CI): 0.77, 1.32; light smokers (0–22 pack-years): OR = 0.97, 95% CI: 0.64, 1.48; medium smokers (23–42 pack-years): OR = 0.98, 95% CI: 0.68, 1.42; heavy smokers ( $\geq 43$  pack-years): OR = 0.84, 95% CI: 0.59, 1.21. Caucasian never smokers: OR = 1.20, 95% CI: 0.97, 1.48; light smokers (0–22 pack-years): OR = 1.21, 95% CI: 0.97, 1.51; medium smokers (23–43 pack-years): OR = 1.16, 95% CI: 0.93, 1.44; heavy smokers ( $\geq 44$  pack-years): OR = 0.97, 95% CI: 0.78, 1.20. *p* for Breslow-Day's test for homogeneity = 0.96 for Asians and 0.37 for Caucasians.

the data set includes information on sex and age, it was possible to adjust the odds ratios for the confounding effect of these variables, and we could perform stratified analyses for both smoking status and occupational exposure in Caucasians. The availability of information on potential confounding variables makes the pooled-analyses preferable to the meta-analysis (105). Furthermore, meta-analyses are restricted to published reports and may lead to biased results if publication bias is present; pooled analysis avoids

this problem by also including unpublished studies. In our meta-analysis, no evidence of publication bias was found after stratifying for ethnicity. However, for Asian studies, we observed a lower and no longer statistically significant odds ratio when the pooled analysis including unpublished studies was performed.

A limitation of both meta- and pooled analysis could be the presence of heterogeneity between studies. We verified the hypothesis of homogeneity, and we performed

**TABLE 7.** Odds ratios and 95% confidence intervals for the association between *GSTT1*\* deletion and lung cancer, stratified according to histologic type: pooled analysis on Asians and Caucasians

|                         | No. of cases | No. of controls | No. of <i>GSTT1</i> null cases | No. of <i>GSTT1</i> null controls | OR*  | 95% CI*    | OR†  | 95% CI     |
|-------------------------|--------------|-----------------|--------------------------------|-----------------------------------|------|------------|------|------------|
| <b>Asians</b>           |              |                 |                                |                                   |      |            |      |            |
| Adenocarcinoma          | 582          | 913             | 282                            | 423                               | 1.09 | 0.88, 1.34 | 1.06 | 0.84, 1.34 |
| Squamous cell carcinoma | 250          | 649             | 108                            | 313                               | 0.82 | 0.61, 1.10 | 0.81 | 0.55, 1.17 |
| Small cell carcinoma    | 71           | 549             | 46                             | 268                               | 1.93 | 1.15, 3.23 | 1.45 | 0.76, 2.77 |
| <b>Caucasians</b>       |              |                 |                                |                                   |      |            |      |            |
| Adenocarcinoma          | 1,106        | 6,573           | 209                            | 1,218                             | 1.02 | 0.87, 1.21 | 1.12 | 0.94, 1.34 |
| Squamous cell carcinoma | 1,507        | 6,777           | 277                            | 1,267                             | 0.98 | 0.85, 1.13 | 1.00 | 0.84, 1.18 |
| Small cell carcinoma    | 593          | 6,559           | 103                            | 1,226                             | 0.91 | 0.73, 1.14 | 0.98 | 0.77, 1.26 |

\* *GSTT1*, glutathione *S*-transferase gene; OR, odds ratio; CI, confidence interval.

† OR adjusted for study, sex, smoking (ever/never), and age (continuous variable).

**TABLE 8. Odds ratios and 95% confidence intervals for the association between *GSTT1*\* deletion and lung cancer, stratified according to occupational exposure: pooled analysis on Caucasians**

|                                             | No. of cases | No. of controls | No. of <i>GSTT1</i> null cases | No. of <i>GSTT1</i> null controls | OR*,† | 95% CI*    | OR†,‡ | 95% CI     |
|---------------------------------------------|--------------|-----------------|--------------------------------|-----------------------------------|-------|------------|-------|------------|
| No occupational exposure                    | 1,192        | 1,040           | 251                            | 228                               | 0.95  | 0.78, 1.16 | 1.05  | 0.84, 1.30 |
| Occupational exposure (all chemical agents) | 1,349        | 1,138           | 225                            | 247                               | 0.72  | 0.59, 0.88 | 0.73  | 0.59, 0.90 |
| Only asbestos exposure                      | 272          | 323             | 44                             | 68                                | 0.72  | 0.48, 1.10 | 0.56  | 0.34, 0.94 |

\* *GSTT1*, glutathione *S*-transferase gene; OR, odds ratio; CI, confidence interval.

† OR adjusted for study, sex, smoking (ever/never), and age (continuous variable).

‡ *p* for Breslow-Day's test for homogeneity = 0.06.

sensitivity analyses by excluding studies that were a source of heterogeneity. Another possible limitation could be the different method of recruiting controls in the various studies. We considered this possible source of bias by performing a stratified analysis according to the source of controls, in both the meta- and the pooled analysis. Data on hospital controls should provide lower risk estimates if the diseases of the controls were associated with the gene variant under study. We confirmed this hypothesis in the pooled analysis only.

**TABLE 9. Adjusted odds ratios and 95% confidence intervals for the main effect and interaction of *GSTT1*\* occupational exposure (all chemicals agents and asbestos only), and lung cancer: pooled analysis on Caucasians**

|                                                | No. of cases | No. of controls | OR*,†,‡ | 95% CI†    |
|------------------------------------------------|--------------|-----------------|---------|------------|
| All chemical agents                            |              |                 |         |            |
| <i>GSTT1</i> present, no occupational exposure | 912          | 804             | 1.00    | Reference  |
| <i>GSTT1</i> present, occupational exposure    | 1,093        | 888             | 1.23    | 1.07, 1.42 |
| <i>GSTT1</i> null, no occupational exposure    | 243          | 227             | 1.06    | 0.85, 1.32 |
| <i>GSTT1</i> null, occupational exposure       | 221          | 245             | 0.90    | 0.74, 1.11 |
| Asbestos only                                  |              |                 |         |            |
| <i>GSTT1</i> present, no asbestos exposure     | 912          | 804             | 1.00    | Reference  |
| <i>GSTT1</i> present, asbestos exposure        | 228          | 255             | 0.85    | 0.68, 1.06 |
| <i>GSTT1</i> null, no asbestos exposure        | 243          | 227             | 1.07    | 0.86, 1.34 |
| <i>GSTT1</i> null, asbestos exposure           | 44           | 68              | 0.59    | 0.41, 0.86 |

\* *GSTT1*, glutathione *S*-transferase gene; OR, odds ratio; CI, confidence interval.

† OR adjusted for study, sex, smoking (ever/never), and age (continuous variable).

‡ *p* for interaction (likelihood ratio test) = 0.02 for all chemical agents; 0.08 for asbestos only.

## LABORATORY TESTS

The detailed methods used for determining the *GSTT1* genotype are described in each article. Most of the studies included in the present analyses used genomic DNA extracted from blood. One study also used bronchial lavage (68), one study used paraffin-embedded tissues and buccal swabs (58) in addition to blood, and one study used only buccal cells (86). All of the articles reported the use of polymerase chain reaction, with different polymerase chain reaction conditions and different control samples.

## POPULATION TESTING

To date, there is insufficient evidence on the role of *GSTT1* in the etiology of lung cancer to make population testing an issue.

## CONCLUSIONS AND RECOMMENDATIONS FOR RESEARCH

No significant association was found between lung cancer and *GSTT1* deletion either overall or in Caucasians. Among Asians, a positive association was found (OR = 1.28, 95 percent CI: 1.10, 1.49) in the meta-analysis, whereas the association was not confirmed in the pooled analysis (OR = 0.97, 95 percent CI: 0.83, 1.13). *GSTT1* appeared to modulate occupational-related lung cancer, at least for asbestos exposure. Further research on *GSTT1* in occupationally exposed subjects and in lung cancer patients, including the use of intermediate biomarkers of exposure and effect, will be useful to clarify the role of *GSTT1* deletion in the carcinogenic process. Specific studies including subjects exposed to human lung carcinogens could be relevant. Interaction between *GSTT1* and other genetic polymorphisms involved in metabolism of environmental carcinogens would be useful to evaluate the possible combined effect of several genetic variants in relation to specific environmental exposures.

## ACKNOWLEDGMENTS

This study was partially supported by Environmental Cancer Risk, Nutrition and Individual Susceptibility (ECNIS) contract 513943.

Conflict of interest: none declared.

## REFERENCES

- Hayes JD, Pulford DJ. The glutathione *S*-transferase supergene family: regulation of GST and the contribution of the isoenzymes to cancer chemoprotection and drug resistance. *Crit Rev Biochem Mol Biol* 1995;30:445–600.
- Landi S. Mammalian class theta GST and differential susceptibility to carcinogens: a review. *Mutat Res* 2000;463:247–83.
- Hayes JD, Flanagan JU, Jowsey IR. Glutathione transferases. *Annu Rev Pharmacol Toxicol* 2005;45:51–88.
- Eaton DL, Bammler TK. Concise review of the glutathione *S*-transferases and their significance to toxicology. *Toxicol Sci* 1999;49:156–64.
- Tan KL, Webb GC, Baker RT, et al. Molecular cloning of a cDNA and chromosomal localization of a human theta-class glutathione *S*-transferase gene (*GSTT2*) to chromosome 22. *Genomics* 1995;25:381–7.
- Webb G, Vaska V, Coggan M, et al. Chromosomal localization of the gene for the human theta class glutathione transferase (*GSTT1*). *Genomics* 1996;33:121–3.
- Meyer DJ. Significance of an unusually low *K<sub>m</sub>* for glutathione in glutathione transferases of the alpha, mu and pi classes. *Xenobiotica* 1993;23:823–34.
- Jemth P, Mannervik B. Kinetic characterization of recombinant human glutathione transferase T1-1, a polymorphic detoxication enzyme. *Arch Biochem Biophys* 1997;348:247–54.
- Juronen E, Tasa G, Uuskula M, et al. Purification, characterization and tissue distribution of human class theta glutathione *S*-transferase T1-1. *Biochem Mol Biol Int* 1996;39:21–9.
- Coggan M, Whitbread L, Whittington A, et al. Structure and organization of the human theta-class glutathione *S*-transferase and D-dopachrome tautomerase gene complex. *Biochem J* 1998;334:617–23.
- Hirvonen A. Genetic factors in individual responses to environmental exposures. *J Occup Environ Med* 1995;37:37–43.
- Wiencke JK, Kelsey KT, Lamela RA, et al. Human glutathione *S*-transferase deficiency as a marker of susceptibility to epoxide-induced cytogenetic damage. *Cancer Res* 1990;50:1585–90.
- Norppa H, Hirvonen A, Jarventaus H, et al. Role of *GSTT1* and *GSTM1* genotypes in determining individual sensitivity to sister chromatid exchange induction by diepoxybutane in cultured human lymphocytes. *Carcinogenesis* 1995;16:1261–4.
- Prochaska HJ, Santamaria AB, Talalay P. Rapid detection of inducers of enzymes that protect against carcinogens. *Proc Natl Acad Sci U S A* 1992;89:2394–8.
- Lin HJ, Probst-Hensch NM, Louie AD, et al. Glutathione transferase null genotype, broccoli, and lower prevalence of colorectal adenomas. *Cancer Epidemiol Biomarkers Prev* 1998;7:647–52.
- Zhang Y, Kolm RH, Mannervik B, et al. Reversible conjugation of isothiocyanates with glutathione catalyzed by human glutathione transferases. *Biochem Biophys Res Commun* 1995;206:748–55.
- London SJ, Yuan JM, Chung FL, et al. Isothiocyanates, glutathione *S*-transferase *M1* and *T1* polymorphisms, and lung-cancer risk: a prospective study of men in Shanghai, China. *Lancet* 2000;356:724–9.
- Sprenger R, Schlagenhauser R, Kerb R, et al. Characterization of the glutathione *S*-transferase *GSTT1* deletion: discrimination of all genotypes by polymerase chain reaction indicates a trimodular genotype-phenotype correlation. *Pharmacogenetics* 2000;10:557–65.
- Pemble S, Schroeder KR, Spencer SR, et al. Human glutathione *S*-transferase theta (*GSTT1*): cDNA cloning and the characterization of a genetic polymorphism. *Biochem J* 1994;300:271–6.
- Hallier E, Langhof T, Dannappel D, et al. Polymorphism of glutathione conjugation of methyl bromide, ethylene oxide and dichloromethane in human blood: influence on the induction of sister chromatid exchanges (SCE) in lymphocytes. *Arch Toxicol* 1993;67:173–8.
- Alexandrie AK, Rannug A, Juronen E, et al. Detection and characterization of a novel functional polymorphism in the *GSTT1* gene. *Pharmacogenetics* 2002;12:613–19.
- Garte S, Gaspari L, Alexandrie AK, et al. Metabolic gene polymorphism frequencies in control populations. *Cancer Epidemiol Biomarkers Prev* 2001;10:1239–48.
- Nelson HH, Wiencke JK, Christiani DC, et al. Ethnic differences in the prevalence of the homozygous deleted genotype of glutathione *S*-transferase theta. *Carcinogenesis* 1995;16:1243–5.
- Warholm M, Alexandrie AK, Högberg J, et al. Polymorphic distribution of glutathione transferase activity with methyl chloride in human blood. *Pharmacogenetics* 1994;4:307–11.
- Strange RC, Spiteri MA, Ramachandran S, et al. Glutathione-*S*-transferase family of enzymes. *Mutat Res* 2001;482:21–6.
- Bao Y, Jemth P, Mannervik B, et al. Reduction of thymine hydroperoxide by phospholipids hydroperoxide glutathione peroxidase and glutathione transferases. *FEBS Lett* 1997;410:210–12.
- Whittington A, Vichai V, Webb G, et al. Gene structure, expression and chromosomal localization of murine theta class glutathione transferase mGSTT1-1. *Biochem J* 1999;337:141–51.
- Meyer DJ, Coles B, Pemble SE, et al. Theta, a new class of glutathione transferases purified from rat and man. *Biochem J* 1991;274:409–14.
- Chamberlain MP, Lock EA, Gaskell BA, et al. The role of glutathione *S*-transferase- and cytochrome P450-dependent metabolism in the olfactory toxicity of methyl iodide in the rat. *Arch Toxicol* 1998;72:420–8.
- DeMarini DM, Shelton ML, Warren SH, et al. Glutathione *S*-transferase-mediated induction of GC→AT transitions by halomethanes in *Salmonella*. *Environ Mol Mutagen* 1997;30:440–7.
- Shimada T, Yamazaki H, Oda Y, et al. Activation and inactivation of carcinogenic dihaloalkanes and other compounds by glutathione *S*-transferase 5-5 in *Salmonella typhimurium* tester strain NM5004. *Chem Res Toxicol* 1996;9:333–40.
- Sherratt PJ, Pulford DJ, Harrison DJ, et al. Evidence that human class Theta glutathione *S*-transferase T1-1 can catalyze the activation of dichloromethane, a liver and lung carcinogen in the mouse. Comparison of the tissue distribution of GST T1-1 with that of classes Alpha, Mu and Pi GST in human. *Biochem J* 1997;326:837–46.
- Hallier E, Schroeder KR, Asmuth K, et al. Metabolism of dichloromethane (methylene chloride) to formaldehyde in human erythrocytes: influence of polymorphism of glutathione transferase theta (*GSTT1-1*). *Arch Toxicol* 1994;68:423–7.
- Parkin DM, Bray F, Ferlay J, et al. Estimating the world cancer burden: *Globocan* 2000. *Int J Cancer* 2001;94:153–6.
- Parkin DM, Whelan SL, Ferlay J, et al, eds. *Cancer incidence in five continents. Vol VIII*. Lyon, France: International Agency for Research on Cancer, 2002. (IARC scientific publication no. 155).

36. Wingo PA, Ries LA, Giovino GA, et al. Annual report to the nation on the status of cancer, 1973–1996, with a special section on lung cancer and tobacco smoking. *J Natl Cancer Inst* 1999;91:675–90.
37. Wynder EL, Muscat JE. The changing epidemiology of smoking and lung cancer histology. *Environ Health Perspect* 1995;103:143–8.
38. Travis WD, Lubin J, Ries L, et al. United States lung carcinoma incidence trends: declining for most histologic types among males, increasing among females. *Cancer* 1996;77:2464–70.
39. Charloux A, Quoix E, Wolkove N, et al. The increasing incidence of lung adenocarcinoma: reality or artifact? A review of the epidemiology of lung adenocarcinoma. *Int J Epidemiol* 1997;26:14–23.
40. Ezzati M, Lopez AD. Estimates of global mortality attributable to smoking in 2000. *Lancet* 2003;362:847–52.
41. Becher H, Jockel KH, Timm J, et al. Smoking cessation and nonsmoking intervals: effect of different smoking patterns on lung cancer risk. *Cancer Causes Control* 1991;2:381–7.
42. Zhong L, Goldberg MS, Parent ME, et al. Exposure to environmental tobacco smoke and the risk of lung cancer: a meta-analysis. *Lung Cancer* 2000;27:3–18.
43. Willett WC. Diet, nutrition, and avoidable cancer. *Environ Health Perspect* 1995;103(suppl 8):165–70.
44. Boffetta P, Nyberg F. Contribution of environmental factors to cancer risk. *Br Med Bull* 2003;68:71–94.
45. National Research Council (NBC). Committee on Health Risks of Exposures to Radon, Board on Radiation Effects Research. Health effects of exposure to radon (BEIR VI). Washington, DC: National Academy Press, 1988.
46. Reszka E, Wasowicz W. Significance of genetic polymorphisms in glutathione *S*-transferase multigene family and lung cancer risk. *Int J Occup Med Environ Health* 2001;14:99–113.
47. Taioli E, Gaspari L, Benhamou S, et al. Polymorphisms in *CYP1A1*, *GSTM1*, *GSTT1* and lung cancer below the age of 45 years. *Int J Epidemiol* 2003;32:60–3.
48. Stucker I, Boffetta P, Antilla S, et al. Lack of interaction between asbestos exposure and glutathione *S*-transferase *M1* and *T1* genotypes in lung carcinogenesis. *Cancer Epidemiol Biomarkers Prev* 2001;10:1253–8.
49. El-Zein R, Zwischenberger JB, Wood TG, et al. Combined genetic polymorphism and risk for development of lung cancer. *Mutat Res* 1997;381:189–200.
50. El-Zein R, Conforti-Froes N, Au WW. Interactions between genetic predisposition and environmental toxicants for development of lung cancer. *Environ Mol Mutagen* 1997;30:196–204.
51. El-Zein RA, Zwischenberger JB, Abdel-Rahman SZ, et al. Polymorphism of metabolizing genes and lung cancer histology: prevalence of *CYP2E1* in adenocarcinoma. *Cancer Lett* 1997;112:71–8.
52. Kelsey KT, Spitz MR, Zuo ZF, et al. Polymorphisms in the glutathione *S*-transferase class mu and theta genes interact and increase susceptibility to lung cancer in minority populations (Texas, United States). *Cancer Causes Control* 1997;8:554–9.
53. To-Figueras J, Gene M, Gomez-Catalan J, et al. Glutathione *S*-transferase *M1* (*GSTM1*) and *T1* (*GSTT1*) polymorphisms and lung cancer risk among northwestern Mediterraneans. *Carcinogenesis* 1997;18:1529–33.
54. Lan Q, He X, Costa D, et al. Glutathione *S*-transferase *GSTM1* and *GSTT1* genotypes and susceptibility to lung cancer. *Wei Sheng Yan Jiu* 1999;28:9–11.
55. To-Figueras J, Gene M, Gomez-Catalan J, et al. Lung cancer susceptibility in relation to combined polymorphisms of microsomal epoxide hydrolase and glutathione *S*-transferase *P1*. *Cancer Lett* 2001;173:155–62.
56. Cajas-Salazar N, Sierra-Torres CH, Salama SA, et al. Combined effect of *MPO*, *GSTM1* and *GSTT1* polymorphisms on chromosome aberrations and lung cancer risk. *Int J Hyg Environ Health* 2003;206:473–83.
57. Wenzlaff AS, Cote ML, Bock CH, et al. *GSTM1*, *GSTT1* and *GSTP1* polymorphisms, environmental tobacco smoke exposure and risk of lung cancer among never smokers: a population-based study. *Carcinogenesis* 2005;26:395–401.
58. Cote ML, Kardia SL, Wenzlaff AS, et al. Combinations of glutathione *S*-transferase genotypes and risk of early-onset lung cancer in Caucasians and African Americans: a population-based study. *Carcinogenesis* 2005;26:811–19.
59. Reszka E, Wasowicz W, Gromadzinska J, et al. Evaluation of selenium, zinc and copper levels related to GST genetic polymorphism in lung cancer patients. *Trace Elem Electrolytes* 2005;22:23–32.
60. Alexandrie AK, Nyberg F, Warholm M, et al. Influence of *CYP1A1*, *GSTM1*, *GSTT1*, and *NQO1* genotypes and cumulative smoking dose on lung cancer risk in a Swedish population. *Cancer Epidemiol Biomarkers Prev* 2004;13:908–14.
61. Belogubova EV, Togo AV, Karpova MB, et al. A novel approach for assessment of cancer predisposing roles of *GSTM1* and *GSTT1* genes: use of putatively cancer resistant elderly tumor-free smokers as the referents. *Lung Cancer* 2004;43:259–66.
62. Harms C, Salama SA, Sierra-Torres CH, et al. Polymorphisms in DNA repair genes, chromosome aberrations, and lung cancer. *Environ Mol Mutagen* 2004;44:74–82.
63. Schneider J, Berges U, Philipp M, et al. *GSTM1*, *GSTT1*, and *GSTP1* polymorphism and lung cancer risk in relation to tobacco smoking. *Cancer Lett* 2004;208:65–74.
64. Sobti RC, Sharma S, Joshi A, et al. Genetic polymorphism of the *CYP1A1*, *CYP2E1*, *GSTM1* and *GSTT1* genes and lung cancer susceptibility in a north Indian population. *Mol Cell Biochem* 2004;266:1–9.
65. Sørensen M, Autrup H, Tjønneland A, et al. Glutathione *S*-transferase *T1* null-genotype is associated with an increased risk of lung cancer. *Int J Cancer* 2004;110:219–24.
66. Dialyna IA, Miyakis S, Georgatou N, et al. Genetic polymorphisms of *CYP1A1*, *GSTM1* and *GSTT1* genes and lung cancer risk. *Oncol Rep* 2003;10:1829–35.
67. Ruano-Ravina A, Figueiras A, Loidi L, et al. *GSTM1* and *GSTT1* polymorphisms, tobacco and risk of lung cancer: a case-control study from Galicia, Spain. *Anticancer Res* 2003;23:4333–7.
68. Lewis SJ, Cherry NM, Niven RM, et al. *GSTM1*, *GSTT1* and *GSTP1* polymorphisms and lung cancer risk. *Cancer Lett* 2002;180:165–71.
69. Stucker I, Hirvonen A, de Wazières I, et al. Genetic polymorphisms of glutathione *S*-transferases as modulators of lung cancer susceptibility. *Carcinogenesis* 2002;23:1475–81.
70. Hou SM, Falt S, Nyberg F. Glutathione *S*-transferase *T1*-null genotype interacts synergistically with heavy smoking on lung cancer risk. *Environ Mol Mutagen* 2001;38:83–6.
71. Liu G, Miller DP, Zhou W, et al. Differential association of the codon 72 p53 and *GSTM1* polymorphisms on histological subtype of non-small cell lung carcinoma. *Cancer Res* 2001;61:8718–22.
72. Risch A, Wikman H, Thiel S, et al. Glutathione-*S*-transferase *M1*, *M3*, *T1* and *P1* polymorphisms and susceptibility to

- non-small-cell lung cancer subtypes and hamartomas. *Pharmacogenetics* 2001;11:757–64.
73. Malats N, Camus-Radon AM, Nyberg F, et al. Lung cancer risk in nonsmokers and *GSTM1* and *GSTT1* genetic polymorphism. *Cancer Epidemiol Biomarkers Prev* 2000;9:827–33.
  74. Spitz MR, Duphorne CM, Detry MA, et al. Dietary intake of isothiocyanates: evidence of a joint effect with glutathione *S*-transferase polymorphisms in lung cancer risk. *Cancer Epidemiol Biomarkers Prev* 2000;9:1017–20.
  75. To-Figueras J, Gene M, Gomez-Catalan J, et al. Genetic polymorphism of glutathione *S*-transferase *P1* gene and lung cancer risk. *Cancer Causes Control* 1999;10:65–70.
  76. Saarikoski ST, Voho A, Reinikainen M, et al. Combined effect of polymorphic GST genes on individual susceptibility to lung cancer. *Int J Cancer* 1998;77:516–21.
  77. Salagovic J, Kalina I, Stubna J, et al. Genetic polymorphism of glutathione *S*-transferases *M1* and *T1* as a risk factor in lung and bladder cancers. *Neoplasma* 1998;45:312–17.
  78. Jourenkova N, Reinikainen M, Bouchardy C, et al. Effects of glutathione *S*-transferases *GSTM1* and *GSTT1* genotypes on lung cancer risk in smokers. *Pharmacogenetics* 1997;7:515–18.
  79. Deakin M, Elder J, Hendrickse C, et al. Glutathione *S*-transferase *GSTT1* genotypes and susceptibility to cancer: studies of interactions with *GSTM1* in lung, oral, gastric and colorectal cancers. *Carcinogenesis* 1996;17:881–4.
  80. Chan-Yeung M, Tan-Un KC, Ip MS, et al. Lung cancer susceptibility and polymorphisms of glutathione-*S*-transferase genes in Hong Kong. *Lung Cancer* 2004;45:155–60.
  81. Liang GY, Pu YP, Yin LH. Studies of the genes related to lung cancer susceptibility in Nanjing Han population, China. (In Chinese). *Yi Chuan* 2004;26:584–8.
  82. Wang J, Deng Y, Cheng J, et al. GST genetic polymorphisms and lung adenocarcinoma susceptibility in a Chinese population. *Cancer Lett* 2003;201:185–93.
  83. Sunaga N, Kohno T, Yanagitani N, et al. Contribution of the *NQO1* and *GSTT1* polymorphisms to lung adenocarcinoma susceptibility. *Cancer Epidemiol Biomarkers Prev* 2002;11:730–8.
  84. Zhao B, Seow A, Lee EJ, et al. Dietary isothiocyanates, glutathione *S*-transferase *-M1*, *-T1* polymorphisms and lung cancer risk among Chinese women in Singapore. *Cancer Epidemiol Biomarkers Prev* 2001;10:1063–7.
  85. Kiyohara C, Yamamura KI, Nakanishi Y, et al. Polymorphism in *GSTM1*, *GSTT1*, and *GSTP1* and susceptibility to lung cancer in a Japanese population. *Asian Pac J Cancer Prev* 2000;1:293–8.
  86. Lan Q, He X, Costa DJ, et al. Indoor coal combustion emissions, *GSTM1* and *GSTT1* genotypes, and lung cancer risk: a case-control study in Xuan Wei, China. *Cancer Epidemiol Biomarkers Prev* 2000;9:605–8.
  87. Yang P, Bamlet WR, Ebbert JO, et al. Glutathione pathway genes and lung cancer risk in young and old populations. *Carcinogenesis* 2004;25:1935–44.
  88. Nazar-Stewart V, Vaughan TL, Stapleton P, et al. A population-based study of glutathione *S*-transferase *M1*, *T1* and *P1* genotypes and risk for lung cancer. *Lung Cancer* 2003;40:247–58.
  89. Gallegos-Arreola MP, Gomez-Meda BC, Morgan-Villela G, et al. *GSTT1* gene deletion is associated with lung cancer in Mexican patients. *Dis Markers* 2003–2004;19:259–61.
  90. Taioli E. International collaborative study on genetic susceptibility to environmental carcinogens. *Cancer Epidemiol Biomarkers Prev* 1999;8:727–8.
  91. Gaspari L, Marinelli D, Taioli E, et al. International collaborative study on genetic susceptibility to environmental carcinogens (GSEC): an update. *Int J Hyg Environ Health* 2001;204:39–42.
  92. Egger M, Smith D, Schneider M, et al. Bias in meta-analysis detected by a simple, graphical test. *BMJ* 1997;315:629–34.
  93. Normand SL. Meta-analysis: formulating, evaluating, combining, and reporting. *Stat Med* 1999;18:321–59.
  94. Vineis P, Bartsch H, Caporaso N, et al. Genetically based *N*-acetyltransferase metabolic polymorphism and low-level environmental exposure to carcinogens. *Nature* 1994;369:154–6.
  95. Garte S, Zocchetti C, Taioli E. Gene-environment interactions in the application of biomarkers of cancer susceptibility in epidemiology. *IARC Sci Publ* 1997;142:251–64.
  96. Hung RJ, Boffetta P, Brockmüller J, et al. *CYP1A1* and *GSTM1* genetic polymorphisms and lung cancer risk in Caucasian nonsmokers: a pooled analysis. *Carcinogenesis* 2003;24:875–82.
  97. Raimondi S, Boffetta P, Anttila S, et al. Metabolic gene polymorphism and lung cancer risk in non-smokers: an update of the GSEC study. *Mutat Res* 2005;592:45–57.
  98. Brockstedt U, Krajcinovic M, Richer C, et al. Analyses of bulky DNA adduct levels in human breast tissue and genetic polymorphisms of cytochromes P450 (CYPs), myeloperoxidase (MPO), quinone oxidoreductase (NQO1), and glutathione *S*-transferases (GSTs). *Mutat Res* 2002;516:41–7.
  99. Viezzer C, Norppa H, Clonfero E, et al. Influence of *GSTM1*, *GSTT1*, *GSTP1*, and *EPHX* gene polymorphisms on DNA adduct level and HPRT mutant frequency in coke-oven workers. *Mutat Res* 1999;431:259–69.
  100. Laffon B, Perez-Cadahia B, Pasaro E, et al. Effect of epoxide hydrolase and glutathione *S*-transferase genotypes on the induction of micronuclei and DNA damage by styrene-7, 8-oxide in vitro. *Mutat Res* 2003;536:49–59.
  101. Yong LC, Schulte PA, Wiencke JK, et al. Hemoglobin adducts and sister chromatid exchanges in hospital workers exposed to ethylene oxide: effects of glutathione *S*-transferase *T1* and *M1* genotypes. *Cancer Epidemiol Biomarkers Prev* 2001;10:539–50.
  102. Marcon F, Andreoli C, Rossi S, et al. Assessment of individual sensitivity to ionizing radiation and DNA repair efficiency in a healthy population. *Mutat Res* 2003;541:1–8.
  103. Scarpato R, Migliore L, Hirvonen A, et al. Cytogenetic monitoring of occupational exposure to pesticides: characterization of *GSTM1*, *GSTT1*, and *NAT2* genotypes. *Environ Mol Mutagen* 1996;27:263–9.
  104. Lodovici M, Luceri C, Guglielmi F, et al. Benzo(a)pyrene diol-epoxide (BPDE)-DNA adduct levels in leukocytes of smokers in relation to polymorphism of *CYP1A1*, *GSTM1*, *GSTP1*, *GSTT1*, and *mEH*. *Cancer Epidemiol Biomarkers Prev* 2004;13:1342–8.
  105. Blettner M, Sauerbrei W, Schlehofer B, et al. Traditional reviews, meta-analyses and pooled analyses in epidemiology. *Int J Epidemiol* 1999;28:1–9.
